# Supplementary material
Source: ML conference proceedings conference paper supplement (https://proceedings.mlr.press/v119/bao20a.html)
Supplement: Supplementary file [file bao20a-supp.pdf]

---

# Supplementary Material: Pseudo-Masked Language Models for Unified Language Model Pre-Training

---

Hangbo Bao<sup>1</sup> Li Dong<sup>2</sup> Furu Wei<sup>2</sup> Wenhui Wang<sup>2</sup> Nan Yang<sup>2</sup> Xiaodong Liu<sup>2</sup> Yu Wang<sup>2</sup> Songhao Piao<sup>1</sup>  
Jianfeng Gao<sup>2</sup> Ming Zhou<sup>2</sup> Hsiao-Wuen Hon<sup>2</sup>

## 1. Hyperparameters for Pre-Training

As shown in Table 1, we present the hyperparameters used for pre-training UNILMv2<sub>BASE</sub>. We use the same WordPiece (Wu et al., 2016) vocabulary and model size as BERT<sub>BASE</sub> (Devlin et al., 2018). We follow the optimization hyperparameters of RoBERTa<sub>BASE</sub> (Liu et al., 2019) for comparisons.

|                        |             |
|------------------------|-------------|
| Layers                 | 12          |
| Hidden size            | 768         |
| FFN inner hidden size  | 3072        |
| Attention heads        | 12          |
| Attention head size    | 64          |
| Max relative position  | 128         |
| Training steps         | 0.5M        |
| Batch size             | 7680        |
| Adam $\epsilon$        | 1e-6        |
| Adam $\beta$           | (0.9, 0.98) |
| Learning rate          | 6e-4        |
| Learning rate schedule | Linear      |
| Warmup ratio           | 0.048       |
| Gradient clipping      | 0.0         |
| Dropout                | 0.1         |
| Weight decay           | 0.01        |

Table 1. Hyperparameters for pre-training UNILMv2<sub>BASE</sub>.

## 2. GLUE Benchmark

Table 2 summarizes the datasets used for the General Language Understanding Evaluation (GLUE) benchmark (Wang et al., 2019).

<sup>1</sup>Harbin Institute of Technology <sup>2</sup>Microsoft Research. Correspondence to: Li Dong <lidong1@microsoft.com>, Furu Wei <fuwei@microsoft.com>.

| Dataset                               | #Train/#Dev/#Test |
|---------------------------------------|-------------------|
| <i>Single-Sentence Classification</i> |                   |
| CoLA (Acceptability)                  | 8.5k/1k/1k        |
| SST-2 (Sentiment)                     | 67k/872/1.8k      |
| <i>Pairwise Text Classification</i>   |                   |
| MNLI (NLI)                            | 393k/20k/20k      |
| RTE (NLI)                             | 2.5k/276/3k       |
| QNLI (NLI)                            | 105k/5.5k/5.5k    |
| WNLI (NLI)                            | 634/71/146        |
| QQP (Paraphrase)                      | 364k/40k/391k     |
| MRPC (Paraphrase)                     | 3.7k/408/1.7k     |
| <i>Text Similarity</i>                |                   |
| STS-B (Similarity)                    | 7k/1.5k/1.4k      |

Table 2. Summary of the GLUE benchmark.

## 3. Hyperparameters for NLU Fine-Tuning

Table 3 reports the hyperparameters used for fine-tuning UNILMv2<sub>BASE</sub> over SQuAD v1.10 (Rajpurkar et al., 2016) / v2.0 (Rajpurkar et al., 2018), and the GLUE benchmark (Wang et al., 2019). The hyperparameters are searched on the development sets according to the average performance of five runs. We use the same hyperparameters for both SQuAD question answering datasets. Moreover, we list the hyperparameters used for the GLUE datasets in Table 3.

|               | SQuAD v1.1/v2.0 | GLUE                             |
|---------------|-----------------|----------------------------------|
| Batch size    | 32              | {16, 32}                         |
| Learning rate | 2e-5            | {5e-6, 1e-5, 1.5e-5, 2e-5, 3e-5} |
| LR schedule   |                 | Linear                           |
| Warmup ratio  | 0.1             | {0.1, 0.2}                       |
| Weight decay  | 0.01            | {0.01, 0.1}                      |
| Epochs        | 4               | {10, 15}                         |

Table 3. Hyperparameters used for fine-tuning on SQuAD, and GLUE.

## 4. Hyperparameters for NLG Fine-Tuning

As shown in Table 4, we present the hyperparameters used for the natural language generation datasets, i.e., CNN/DailyMail (See et al., 2017), XSum (Narayan et al., 2018), and SQuAD question generation (QG; Du & Cardie 2018; Zhao et al. 2018). The total length is set to 512 for QG, and 768 for CNN/DailyMail and XSum. The maximum output length is set to 160 for CNN/DailyMail, and 48 for XSum and QG. The label smoothing (Szegedy et al., 2016) rate is 0.1. During decoding, we use beam search to generate the outputs. Length penalty (Wu et al., 2016) is also used to score candidates.

|                        | CNN/DailyMail | XSum   | QG   |
|------------------------|---------------|--------|------|
| <i>Fine-Tuning</i>     |               |        |      |
| Learning rate          | 7e-5          | 7e-5   | 2e-5 |
| Batch size             | 64            | 64     | 48   |
| Weight decay           |               | 0.01   |      |
| Epochs                 | 14            | 14     | 16   |
| Learning rate schedule |               | Linear |      |
| Warmup ratio           | 0.02          | 0.02   | 0.1  |
| Label smoothing        |               | 0.1    |      |
| Max input length       | 608           | 720    | 464  |
| Max output length      | 160           | 48     | 48   |
| <i>Decoding</i>        |               |        |      |
| Length penalty         | 0.7           | 0.6    | 1.3  |
| Beam size              | 5             | 5      | 8    |

Table 4. Hyperparameters used for fine-tuning and decoding on CNN/DailyMail, XSum, and question generation (QG).

## References

- Devlin, J., Chang, M., Lee, K., and Toutanova, K. BERT: pre-training of deep bidirectional transformers for language understanding. *CoRR*, abs/1810.04805, 2018.
- Du, X. and Cardie, C. Harvesting paragraph-level question-answer pairs from wikipedia. In *Proceedings of the 56th Annual Meeting of the Association for Computational Linguistics, ACL 2018, Melbourne, Australia, July 15-20, 2018, Volume 1: Long Papers*, pp. 1907–1917, 2018.
- Liu, Y., Ott, M., Goyal, N., Du, J., Joshi, M., Chen, D., Levy, O., Lewis, M., Zettlemoyer, L., and Stoyanov, V. RoBERTa: A robustly optimized BERT pretraining approach. *arXiv preprint arXiv:1907.11692*, 2019.
- Narayan, S., Cohen, S. B., and Lapata, M. Don’t give me the details, just the summary! topic-aware convolutional neural networks for extreme summarization. In *Proceedings of the 2018 Conference on Empirical Methods in Natural Language Processing*, pp. 1797–1807, Brussels, Belgium, 2018.
- Rajpurkar, P., Zhang, J., Lopyrev, K., and Liang, P. SQuAD: 100,000+ questions for machine comprehension of text. In *Proceedings of the 2016 Conference on Empirical Methods in Natural Language Processing*, pp. 2383–2392, Austin, Texas, 2016.
- Rajpurkar, P., Jia, R., and Liang, P. Know what you don’t know: Unanswerable questions for SQuAD. In *Proceedings of the 56th Annual Meeting of the Association for Computational Linguistics, ACL 2018, Melbourne, Australia, July 15-20, 2018, Volume 2: Short Papers*, pp. 784–789, 2018.
- See, A., Liu, P. J., and Manning, C. D. Get to the point: Summarization with pointer-generator networks. In *Proceedings of the 55th Annual Meeting of the Association for Computational Linguistics*, pp. 1073–1083, Vancouver, Canada, 2017.
- Szegedy, C., Vanhoucke, V., Ioffe, S., Shlens, J., and Wojna, Z. Rethinking the inception architecture for computer vision. In *Proceedings of the IEEE Conference on Computer Vision and Pattern Recognition*, 2016.
- Wang, A., Singh, A., Michael, J., Hill, F., Levy, O., and Bowman, S. R. GLUE: A multi-task benchmark and analysis platform for natural language understanding. In *International Conference on Learning Representations*, 2019.
- Wu, Y., Schuster, M., Chen, Z., Le, Q. V., Norouzi, M., Macherey, W., Krikun, M., Cao, Y., Gao, Q., Macherey, K., Klingner, J., Shah, A., Johnson, M., Liu, X., Kaiser, L., Gouws, S., Kato, Y., Kudo, T., Kazawa, H., Stevens, K., Kurian, G., Patil, N., Wang, W., Young, C., Smith, J., Riesa, J., Rudnick, A., Vinyals, O., Corrado, G., Hughes, M., and Dean, J. Google’s neural machine translation system: Bridging the gap between human and machine translation. *CoRR*, abs/1609.08144, 2016.
- Zhao, Y., Ni, X., Ding, Y., and Ke, Q. Paragraph-level neural question generation with maxout pointer and gated self-attention networks. In *Proceedings of the 2018 Conference on Empirical Methods in Natural Language Processing*, pp. 3901–3910, Brussels, Belgium, 2018.
